1 **Full Title:**

2 History of incarceration and age-related cognitive impairment: Testing models of genetic and  
3 environmental risk in longitudinal panel study of older adults.

4

5 **Short Title:**

6 History of incarceration and cognitive impairment in later life.

7

8 **Authors:**

9 Peter T. Tanksley<sup>1,2</sup>

10 Matthew W. Logan<sup>3</sup>

11 J.C. Barnes<sup>4</sup>

12

13 **Affiliations:**

14 <sup>1</sup>Population Research Center, University of Texas at Austin, Austin, TX, USA

15 <sup>2</sup>Department of Psychology, University of Texas at Austin, Austin, TX, USA

16 <sup>3</sup>School of Criminal Justice and Criminology, Texas State University, San Marcos, TX, USA

17 <sup>4</sup>School of Criminal Justice, University of Cincinnati, Cincinnati, OH, USA

18 **Abstract (204/300)**

19 History of incarceration is associated with an excess of morbidity and mortality. While the  
20 incarceration experience itself comes with substantive health risks (e.g., injury, psychological  
21 stress, exposure to infectious disease), most inmates eventually return to the general population  
22 where they will be diagnosed with the same age-related conditions that drive mortality in the  
23 non-incarcerated population but at exaggerated rates. However, the interplay between history of  
24 incarceration as a risk factor and more traditional risk factors for age-related diseases (e.g.,  
25 genetic risk factors) has not been studied. Here, we focus on cognitive impairment, a hallmark of  
26 neurodegenerative conditions like Alzheimer’s disease, as an age-related state that may be  
27 uniquely impacted by the confluence of environmental stressors (e.g., incarceration) and genetic  
28 risk factors. Using data from the Health and Retirement Study, we found that incarceration and  
29 *APOE-ε4* genotype (i.e., the chief genetic risk factor for Alzheimer’s disease) both constituted  
30 substantive risk factors for cognitive impairment in terms of overall risk and earlier onset. The  
31 observed effects were mutually independent, however, suggesting that the risk conveyed by  
32 incarceration and *APOE-ε4* genotype operate across different risk pathways. Our results have  
33 implications for the study of criminal justice contact as a public health risk factor for age-related,  
34 neurodegenerative conditions.

35 **Introduction**

36 The effects of incarceration are insidious, pervasive, and correspond with a litany of  
37 physical and mental health afflictions among offenders.(1-7) Although the causal mechanisms  
38 underlying these relationships are nuanced, there is considerable evidence to suggest that  
39 imprisonment exacerbates pre-existing medical conditions and other risk factors due to high rates  
40 of exposure to environmental stressors, such as prison violence and victimization, and low rates  
41 of identification and treatment during the intake process. Research also indicates that the effects  
42 of incarceration are durable and extend into the communities to which individuals return,  
43 negatively impacting their quality of life and expectancy.(8)

44 Of particular importance to practitioners and policymakers is the influence of the  
45 incarceration experience on acute and chronic causes of early mortality. In the time period  
46 around their release, people leaving prison are more likely to die from opioid use disorders  
47 (OUDs), overdose, suicide, and homicide.(9-17) One large-scale review on incarceration and  
48 health found that most post-release mortality studies focus on short-term effects and indicate that  
49 the period immediately following release represented a high-risk time for early mortality among  
50 former inmates due to acute causes.(18)

51 The long-term impact of incarceration on mortality (i.e., via chronic health conditions) is  
52 less well understood. Most former inmates survive the high-mortality period immediately  
53 following release and eventually succumb to the same chronic conditions that drive mortality for  
54 the general population such as cancer, cardiovascular disease, and neurodegenerative diseases  
55 such as Alzheimer’s Disease and Related Dementias (ADRDs).(19-23) Our focus here is on the  
56 latter affliction; specifically, the potential long-term effects of incarceration on the onset and  
57 progression of neurodegeneration as indicated by cognitive impairment.

58           Relative to other chronic conditions, neurodegenerative diseases and their potential link  
59 with incarceration history have received less attention(24) (but see (25-27)). Still, existing  
60 research generally finds that age-related cognitive impairments (i.e., the chief indicator of  
61 neurodegeneration) are more prevalent among those who have been incarcerated at some point in  
62 their lives compared to the general population.(19, 20, 22) This is unsurprising, as former  
63 inmates are subject to a constellation of risk factors including acute stressors (e.g., traumatic  
64 brain injury, high infectious disease burden), chronic stressors (e.g., disenfranchisement,  
65 unemployment), and lack of social integration (e.g., difficulty maintaining familial connections,  
66 homelessness).(18, 28) Together, incarceration and its collateral consequences have been  
67 identified as powerful environmental risk factors for the development and progression of  
68 neurodegenerative conditions. However, it is not well-understood if/how the risks associated  
69 with the incarceration experience interact with the other main source of risk for  
70 neurodegeneration: genetic risk factors.

71           Neurodegenerative diseases possess complex genetic etiologies. Alzheimer’s disease  
72 (AD), for example, is oligogenic, meaning it is primarily influenced by a small number of  
73 genetic variants. For instance, apolipoprotein E (*APOE*) is a gene that codes for proteins that  
74 bind and transport low-density lipids and contribute to cholesterol clearance from the  
75 bloodstream.(29) Variation in this gene can impact cholesterol metabolism and may lead to  
76 increased risk for stroke, cardiovascular disease, and diagnosis of AD.(30) The *APOE* genotype  
77 is determined by two variants (rs7412 and rs429358), resulting in three main isoforms of protein  
78 *apoE*: E2, E3, and E4 encoded by the  $\epsilon$ 2,  $\epsilon$ 3, and  $\epsilon$ 4 alleles, respectively. The *APOE- $\epsilon$ 4* allele has  
79 been linked with substantial increases in the risk of developing late-onset Alzheimer’s disease.  
80 Possession of one copy of the *APOE- $\epsilon$ 4* allele confers a 3-fold increase in risk while two copies

81 confer a 15-fold increase, making *APOE-ε4* status the strongest genetic predictor of Alzheimer’s  
82 disease risk.(31) Recent genome-wide association studies have begun to illuminate polygenic  
83 variation that contributes to AD(32), but highly impactful genes like *APOE* still loom large in the  
84 landscape of genetic risk.

85 Despite their strong genetic basis, neurodegenerative diseases are also affected by  
86 environmental risk factors. The 2020 Lancet Commission report on dementia prevention,  
87 intervention, and care identified 12 modifiable risk factors that, together, accounted for 40% of  
88 dementias world-wide.(33) These included education, hearing loss, traumatic brain injury,  
89 hypertension, alcohol intake, obesity, smoking, depression, social isolation, physical inactivity,  
90 diabetes, and air pollution. Minoritized groups, particularly African Americans in the US, also  
91 bear increased risk for neurodegeneration.(34) Considering these environmental risk factors and  
92 overrepresentation of minoritized groups in the correctional system, it is unsurprising that recent  
93 research has found that neurodegenerative diseases are more prevalent in the current/former  
94 members of the carceral population than among the general population.(35)

95 Here, we draw these two lines of research together to examine how incarceration history  
96 and *APOE-ε4* genotype combine to produce risk for neurodegeneration as indicated by cognitive  
97 impairment. We posit four possible scenarios (**Figure 1**): (1) genetic risks dominate prediction of  
98 cognitive impairment (“genetic risk model”); (2) environmental risks dominate prediction of  
99 cognitive impairment (“environmental risk model”), (3) genetic and environmental risks  
100 independently predict cognitive impairment (“G+E model”), and (4) genetic and environmental  
101 risks interact to produce multiplicative risk for cognitive impairment (“G×E model”). We test for  
102 evidence of these four scenarios in terms of both overall risk (i.e., ever developing cognitive  
103 impairment) and progression of cognitive impairment (i.e., age of onset).

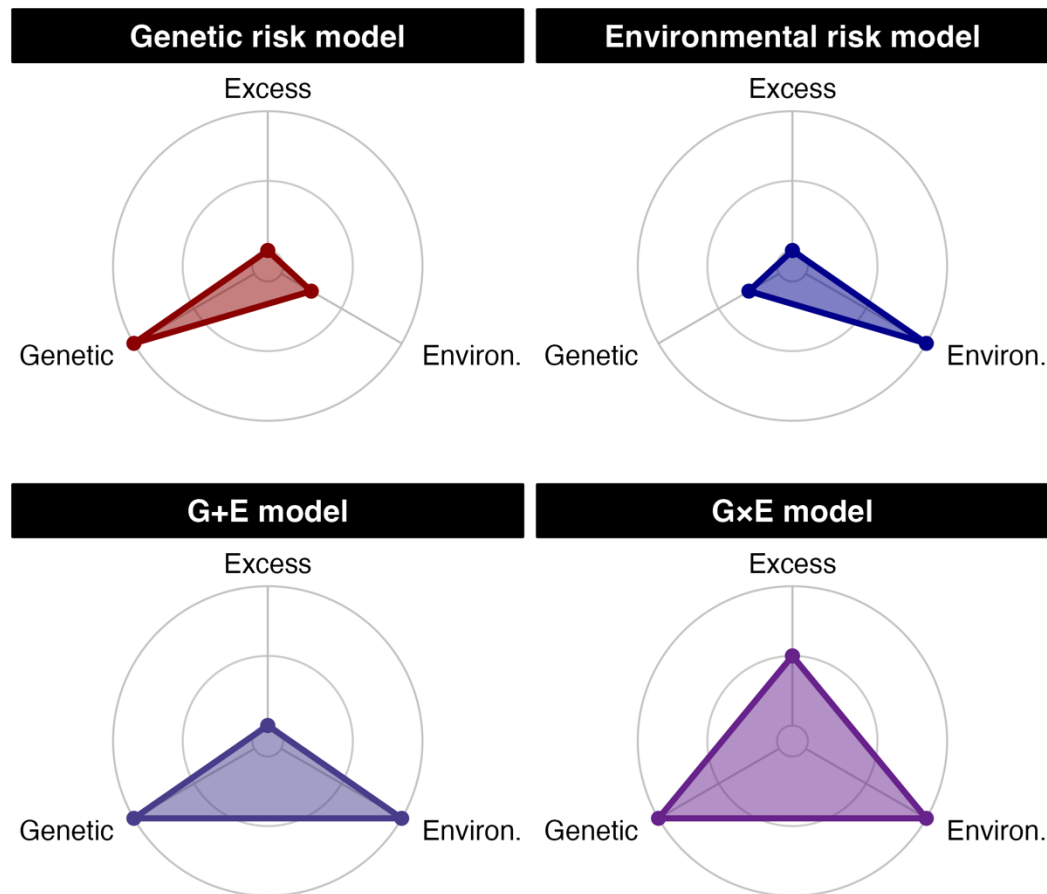

**Figure 1.** Radar plots showing the theoretical models of prediction sources (genetic, environmental, excess) explored in the current study. Distance from the origin of each plot represents the increasing magnitude of each risk factor’s predictive power. Note: “Excess” refers to the additional prediction achieved by a model containing an interaction term.

104

105

## Methods

106 **Data**

107 Data come from the Health and Retirement Study (HRS), a nationally representative  
108 cohort study of elderly Americans aged  $\geq 50$ .(36) The HRS collects information from  
109 participants on a biennial basis on social, demographic, economic, behavioral, and health  
110 conditions. In addition to the main survey, the HRS randomly selected half the sample to receive  
111 enhanced face-to-face interviews starting in 2006 and alternating to the other half of the sample  
112 with each wave of data collection. Enhanced interviews included physical performance

113 measurements, blood and saliva samples, and a leave-behind psychosocial questionnaire. The  
114 current study relies on deidentified participant data on cognitive impairment from the main  
115 study, as well as *APOE-ε4* genotype and information on lifetime incarceration drawn from the  
116 enhanced interviews. The analytic sample with complete data included  $N=6,949$  cases with  
117  $N=55,345$  observations (see **Figure S1** information on missingness).

## 118 **Measures**

119 *Cognitive impairment.* We assessed cognitive status of HRS participants using the  
120 classification scheme developed for the HRS. All participants were administered the Telephone  
121 Interview for Cognitive Status (TICS), a telephone-based instrument that probed cognitive  
122 functioning along seven domains: memory, mental status, abstract reasoning, fluid reasoning,  
123 vocabulary, dementia, and numeracy. In 2009, a methodology was developed for using TICS  
124 scores to classify respondents as “normal”, “cognitively impaired non-dementia”, and  
125 “demented”. The classification system was validated by a team of dementia experts by  
126 comparing TICS scores to the Aging, Demographic, and Memory Study (ADAMS), a subsample  
127 of the HRS who received a more extensive psychological battery.(37) For the current analysis,  
128 we used repeated measures of the Langa-Weir Cognitive Status classifications for assessment  
129 years 1998-2020 from the HRS user contributed data set. To avoid small cell counts, we  
130 combined both non-normal cognitive states into one “impaired” category, resulting in a  
131 dichotomous *cognitive impairment* variable.

132 *Lifetime Incarceration.* HRS participants were asked about adverse experiences in  
133 adulthood including “Have you ever been an inmate in a jail, prison, juvenile detention center, or  
134 other correctional facility?”. Respondents received a score of 1 if they answered “Yes” and a  
135 score of 0 if they answered “No”. This question was asked in 2012/2014 and answers were coded

136 so that if an individual answered “Yes” to either wave they received a score of 1 on the *Lifetime*  
137 *Incarceration* measure. Cases were only categorized as “missing” if they did not provide  
138 responses on both waves of data collection. The resulting variable indicated that approximately  
139 10% of the analytic samples had some history of incarceration (**Table 1**). These observed rates of  
140 incarceration align with other national estimates.(38)

141 *APOE-ε4 genotype*. We assess monogenic risk for neurodegeneration by classifying HRS  
142 participants according to the number of *APOE-ε4* alleles they carry as the ε4 allele has been  
143 linked with large increases in risk for stroke and heart disease and is the leading genetic risk  
144 factor for Alzheimer’s disease. *APOE* genotype was assessed in the HRS using two methods.  
145 The primary method relied on direct genotyping using TaqMan allelic discrimination SNP assays  
146 and saliva samples collected from consenting HRS participants during years 2006, 2008, 2010,  
147 and 2012.(39) Among individuals for whom direct genotyping was not conducted, *APOE*  
148 genotype was classified using imputed genotype array data. Following Ware and colleagues(40),  
149 we removed samples with imputed *APOE* genotypes with INFO Scores of <99%. We coded  
150 *APOE-ε4* genotype according to the number of ε4 alleles contained in each participants’  
151 genotype, ranging from 0-2, with more alleles representing greater risk.

152 *Covariates*. Each model was adjusted for age, self-reported race/ethnicity, self-reported  
153 sex, history of ever smoking, history of stroke (ever had/doctor suspected stroke=1), high school  
154 completion, social origins index (i.e., childhood financial hardship)(41), and HRS birth cohort.



**Table 1.** Individual and observation-level descriptive statistics of the Health and Retirement Study sample.

| Variable                         | Overall, N = 6,949 <sup>1</sup> | Ever incarcerated?         |                           | p-value <sup>2</sup> |
|----------------------------------|---------------------------------|----------------------------|---------------------------|----------------------|
|                                  |                                 | No, N = 6,244 <sup>1</sup> | Yes, N = 705 <sup>1</sup> |                      |
| <b>Individuals (N = 6,949)</b>   |                                 |                            |                           |                      |
| HRS cohort                       |                                 |                            |                           | <b>&lt;0.001</b>     |
| AHEAD                            | 511 (7.4%)                      | 491 (7.9%)                 | 20 (2.8%)                 |                      |
| CODA                             | 656 (9.4%)                      | 638 (10%)                  | 18 (2.6%)                 |                      |
| WB                               | 1,318 (19%)                     | 1,226 (20%)                | 92 (13%)                  |                      |
| EBB                              | 2,289 (33%)                     | 2,008 (32%)                | 281 (40%)                 |                      |
| MBB                              | 2,175 (31%)                     | 1,881 (30%)                | 294 (42%)                 |                      |
| Self-reported sex                |                                 |                            |                           | <b>&lt;0.001</b>     |
| Female                           | 4,099 (59%)                     | 3,912 (63%)                | 187 (27%)                 |                      |
| Male                             | 2,850 (41%)                     | 2,332 (37%)                | 518 (73%)                 |                      |
| Race/Ethnicity                   |                                 |                            |                           | <b>&lt;0.001</b>     |
| White                            | 4,592 (66%)                     | 4,243 (68%)                | 349 (50%)                 |                      |
| Black                            | 1,229 (18%)                     | 996 (16%)                  | 233 (33%)                 |                      |
| Hispanic                         | 903 (13%)                       | 799 (13%)                  | 104 (15%)                 |                      |
| Other                            | 225 (3.2%)                      | 206 (3.3%)                 | 19 (2.7%)                 |                      |
| Years in study                   | 14.2 (5.2)                      | 14.4 (5.2)                 | 12.0 (4.8)                | <b>&lt;0.001</b>     |
| HS completion                    |                                 |                            |                           | <b>&lt;0.001</b>     |
| High school or more              | 5,880 (85%)                     | 5,361 (86%)                | 519 (74%)                 |                      |
| Less than high school            | 1,069 (15%)                     | 883 (14%)                  | 186 (26%)                 |                      |
| Ever smoker                      |                                 |                            |                           | <b>&lt;0.001</b>     |
| Yes                              | 3,723 (54%)                     | 3,164 (51%)                | 559 (79%)                 |                      |
| No                               | 3,226 (46%)                     | 3,080 (49%)                | 146 (21%)                 |                      |
| APOE-ε4 count                    |                                 |                            |                           | 0.088                |
| Zero copies                      | 5,202 (75%)                     | 4,697 (75%)                | 505 (72%)                 |                      |
| One copy                         | 1,603 (23%)                     | 1,417 (23%)                | 186 (26%)                 |                      |
| Two copies                       | 144 (2.1%)                      | 130 (2.1%)                 | 14 (2.0%)                 |                      |
| Social origins index             | 0.91 (1.17)                     | 0.87 (1.14)                | 1.26 (1.33)               | <b>&lt;0.001</b>     |
| <b>Observations (N = 55,345)</b> |                                 |                            |                           |                      |
| Age (mean) <sup>3</sup>          | 64.63 (9.83)                    | 64.94 (9.96)               | 61.43 (7.62)              | <b>&lt;0.001</b>     |
| Cognitive function               |                                 |                            |                           | <b>&lt;0.001</b>     |
| Impaired                         | 8,275 (15%)                     | 7,199 (14%)                | 1,076 (22%)               |                      |
| Normal                           | 47,070 (85%)                    | 43,288 (86%)               | 3,782 (78%)               |                      |
| History of stroke                |                                 |                            |                           | 0.228                |
| Yes                              | 3,329 (6.0%)                    | 2,962 (5.9%)               | 367 (7.6%)                |                      |
| No                               | 52,016 (94%)                    | 47,525 (94%)               | 4,491 (92%)               |                      |
| Study year                       |                                 |                            |                           | <b>&lt;0.001</b>     |
| 1998                             | 2,278 (4.1%)                    | 2,167 (4.3%)               | 111 (2.3%)                |                      |
| 2000                             | 2,287 (4.1%)                    | 2,178 (4.3%)               | 109 (2.2%)                |                      |
| 2002                             | 2,345 (4.2%)                    | 2,230 (4.4%)               | 115 (2.4%)                |                      |
| 2004                             | 3,971 (7.2%)                    | 3,678 (7.3%)               | 293 (6.0%)                |                      |
| 2006                             | 3,982 (7.2%)                    | 3,696 (7.3%)               | 286 (5.9%)                |                      |
| 2008                             | 4,020 (7.3%)                    | 3,726 (7.4%)               | 294 (6.1%)                |                      |
| 2010                             | 6,812 (12%)                     | 6,127 (12%)                | 685 (14%)                 |                      |
| 2012                             | 6,886 (12%)                     | 6,187 (12%)                | 699 (14%)                 |                      |
| 2014                             | 6,702 (12%)                     | 6,022 (12%)                | 680 (14%)                 |                      |
| 2016                             | 6,024 (11%)                     | 5,420 (11%)                | 604 (12%)                 |                      |
| 2018                             | 5,183 (9.4%)                    | 4,667 (9.2%)               | 516 (11%)                 |                      |
| 2020                             | 4,855 (8.8%)                    | 4,389 (8.7%)               | 466 (9.6%)                |                      |

<sup>1</sup> n (%); Mean (SD)

<sup>2</sup> Pearson's Chi-squared test (categorical); Wilcoxon rank sum test (continuous); repeated measures logistic regression with random intercept at the individual level (cognitive function, history of stroke).

<sup>3</sup>Age was averaged across observations and tested for differences across incarceration groups using the Wilcoxon rank sum test.

## 156 **Analytic strategy**

157           We estimated the overall risk for cognitive impairment in the HRS as a function of  
158 lifetime incarceration and *APOE-ε4* genotype using a generalized mixed linear modeling  
159 framework. We estimated incidence rate ratios (IRRs) of cognitive impairment using Poisson  
160 regression models with a random intercept at the individual level to account for non-  
161 independence due to multiple observations. This approach removes interrelatedness among  
162 observations from the same individual, allowing for the interpretation of results as if they were  
163 drawn from a cross-sectional sample of unrelated individuals. Next, we estimated the hazard for  
164 onset of cognitive impairment using two time-to-event methods. First, using nonparametric  
165 Kaplan-Meier survival curves, we compared the unadjusted differences between strata of interest  
166 (e.g., incarcerated vs. never-incarcerated; *APOE-ε4* allele counts of zero vs. one. vs. two) using  
167 log-rank tests. Next, covariate adjustment was accomplished using Cox proportional hazard  
168 models. Time-varying covariates (e.g., stroke) were accommodated by creating panel datasets  
169 with one row per individual per observation. Both survival methods used chronological age as  
170 the time-scale, an alternative to the time-on-study approach, because it is recommended for  
171 analyses in elderly cohorts with age-dependent outcomes.(42, 43) According to  
172 recommendations for age-scale survival models(44), we addressed possible calendar effects by  
173 stratifying Cox models by HRS cohort (i.e., allowing each birth cohort to have a different  
174 baseline risk). Additionally, as the age-based time-scale effectively accounts for age, we did not  
175 include age as a covariate in the Cox models. The proportionality assumption was confirmed for  
176 all Cox models by examining Schoenfeld residuals.

## 177 **Results**

### 178 **Do genetic risk factors predict cognitive impairment in older adults?**

179 We found that *APOE-ε4 genotype* was associated with an increased risk of impaired  
 180 cognitive function during the study period (**Table 2**). Consistent with prior research, we  
 181 observed that, relative to those with no *APOE-ε4* alleles, risk for cognitive impairment increased  
 182 as *APOE-ε4* allele count increased from one allele (IRR=1.12, 95% CI [1.01-1.23], P=0.025) to  
 183 two (IRR=1.48, 95% CI [1.12-1.95], P=0.006) (**Model 2.1**). When estimated in the same model  
 184 as *Lifetime incarceration* (**Model 2.3**) the results were essentially unchanged, suggesting that the  
 185 monogenic risk for cognitive impairment conferred by *APOE-ε4 genotype* is independent of  
 186 *Lifetime incarceration*.

**Table 2.** Mixed effect Poisson regression of cognitive status on *APOE-ε4* genotype and lifetime incarceration

| Variable <sup>1</sup>       | Model 2.1          |                     | Model 2.2          |                     | Model 2.3          |                     | Model 2.4          |                     |
|-----------------------------|--------------------|---------------------|--------------------|---------------------|--------------------|---------------------|--------------------|---------------------|
|                             | IRR <sup>2,3</sup> | 95% CI <sup>3</sup> | IRR <sup>2,3</sup> | 95% CI <sup>3</sup> | IRR <sup>2,3</sup> | 95% CI <sup>3</sup> | IRR <sup>2,3</sup> | 95% CI <sup>3</sup> |
| <i>APOE-ε4</i> allele count |                    |                     |                    |                     |                    |                     |                    |                     |
| Zero copies                 | —                  |                     | —                  |                     | —                  |                     | —                  |                     |
| One copy                    | 1.12*              | [1.01, 1.23]        |                    |                     | 1.11*              | [1.01, 1.23]        | 1.09               | [0.98, 1.21]        |
| Two copies                  | 1.48**             | [1.12, 1.95]        |                    |                     | 1.49**             | [1.13, 1.96]        | 1.49**             | [1.11, 1.99]        |
| Lifetime incarceration      |                    |                     | 1.49***            | [1.30, 1.70]        | 1.49***            | [1.30, 1.70]        | 1.42***            | [1.21, 1.66]        |
| Lifetime Incarceration      |                    |                     |                    |                     |                    |                     |                    |                     |
| × One copy                  |                    |                     |                    |                     |                    |                     | 1.18               | [0.89, 1.56]        |
| × Two copies                |                    |                     |                    |                     |                    |                     | 0.99               | [0.42, 2.34]        |

<sup>1</sup> All models also adjusted for age, sex, race/ethnicity, high school completion, smoking history, stroke history, social origins index, and HRS cohort.

<sup>2</sup> \*p<0.05; \*\*p<0.01; \*\*\*p<0.001

<sup>3</sup> IRR = Incidence Rate Ratio, CI = Confidence Interval

187

## 188 **Is lifetime incarceration a risk factor for cognitive impairment in older adults?**

189 We found that *Lifetime incarceration* conferred a substantive increase in the risk of  
 190 cognitive impairment (**Table 2**). HRS participants with a history of incarceration were 1.5 times  
 191 as likely to be cognitively impaired than their non-incarcerated peers (IRR=1.49, 95% CI=[1.30,

192 1.70],  $P < 0.001$ ) (**Model 2.2**)—a level of risk equal to that for individuals with two *APOE-ε4*  
193 alleles. As before, we found that association between *Lifetime Incarceration* and *Cognitive*  
194 *Impairment* were virtually unchanged when *APOE-ε4 genotype* was included in the model  
195 (**Model 2.3**) suggesting independent influences on impairment in the sample.

196 These findings support the interpretation that *APOE-ε4 genotype* and *Lifetime*  
197 *incarceration* operate as independent risk factors for *Cognitive impairment* in later adulthood.  
198 The possibility remains, however, that these genetic and environmental sources of risk, when  
199 brought together, will go beyond their additive effects to inflict a multiplicative increase in risk  
200 for impairment. We test this possibility in the next section.

### 201 **Does the incarceration experience amplify genetic risk factors for cognitive impairment in** 202 **older adults?**

203 We did not find evidence that *Lifetime incarceration* interacts with *APOE-ε4 genotype* to  
204 produce excess risk for cognitive impairment. We entered multiplicative interaction terms for  
205 *Lifetime incarceration* and *APOE-ε4 genotype* into our analysis (**Model 2.4**) and found that  
206 neither term predicted excess risk of cognitive impairment that was distinguishable from the  
207 additive effects. Re-estimating **Model 2.4** as a linear model under a linear probability framework  
208 produced the same null results, suggesting the lack of interaction was not due to the scale of the  
209 interaction (i.e., multiplicative vs. additive).<sup>(45)</sup> This finding supports the interpretation that  
210 *Lifetime incarceration* and *APOE-ε4 genotype* convey their risk for later life cognitive  
211 impairment in a fashion that is independent and additive in nature.

### 212 **Do genetic risk factors for AD predict earlier cognitive impairment?**

213 In addition to conferring more risk for cognitive impairment at any point (reported  
214 above), we found that *APOE-ε4 genotype* was associated with risk for earlier onset as well. We

215 estimated univariate Kaplan-Meier survival curves using age at first indication of cognitive  
216 impairment and found statistically significant differences across *APOE-ε4* genotype according to  
217 a log-rank test ( $\chi^2(2)=45.3$ ,  $P<0.001$ ) (**Figure 2A**). The ages of median survival probability  
218 across *APOE-ε4* genotypes were 79 (zero copies of *APOE-ε4*), 74 (one copy of *APOE-ε4*), and  
219 72 (two copies of *APOE-ε4*). We adjusted for covariates with a Cox proportional hazard model  
220 using panel datasets to accommodate time-dependent covariates (e.g., stroke history). We  
221 observed that possession of one (HR=1.19, 95% CI [1.08-1.31],  $P<0.001$ ) or two copies  
222 (HR=1.56, 95% CI [1.20-2.02],  $P<0.001$ ) of *APOE-ε4* resulted in significantly greater hazard for  
223 developing cognitive impairment in later life (**Table S1, Model S1.1**).

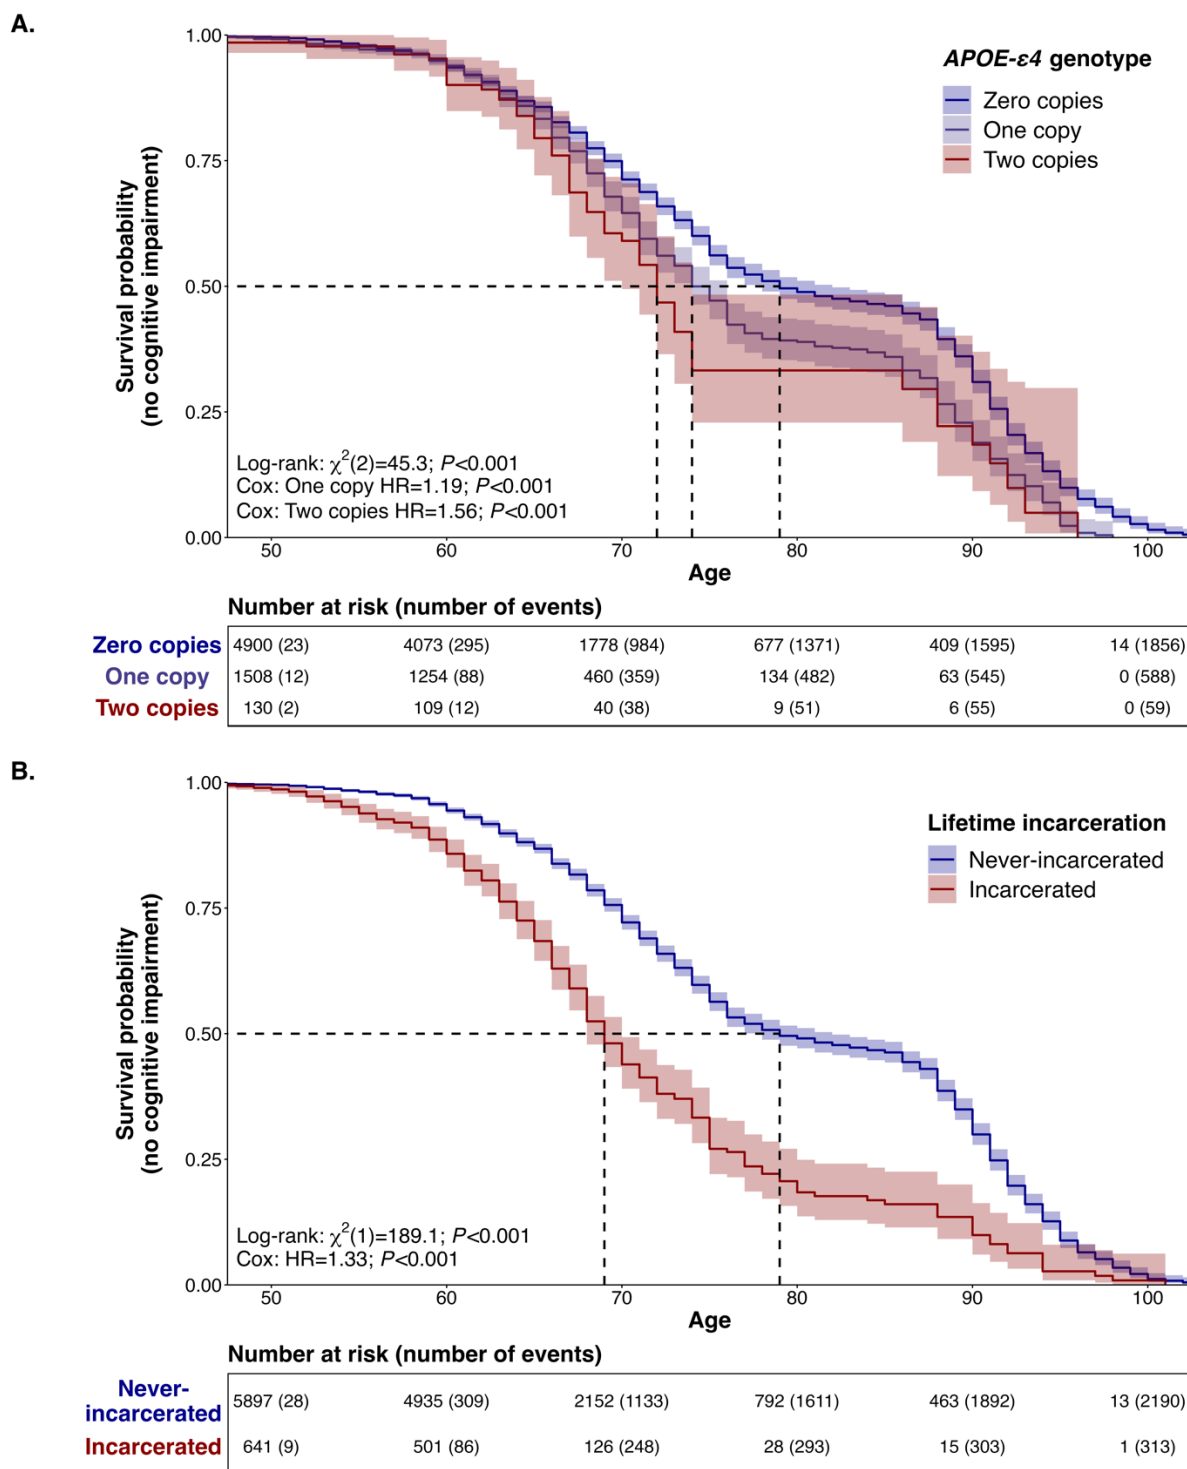

**Figure 2.** Non-parametric Kaplan-Meier survival curves and risk tables for onset of cognitive impairment, stratified by *APOE-ε4* genotype (**Panel A**) and lifetime incarceration (**Panel B**), respectively. Time-scale corresponds to chronological age. Dashed lines indicate age at median survival probability per stratum. Number of events (i.e., first designation of cognitive impairment) are cumulative. Note: individuals were considered censored for any non-event status (e.g., death, non-participation); x-axis used a floor of age 50 for clarity.

224

## 225 **Does lifetime incarceration predict earlier cognitive impairment?**

226 We found evidence that HRS participants with a history of incarceration were at risk for  
227 earlier cognitive impairment compared to those without. Comparing Kaplan-Meier survival  
228 curves, we found that individuals with a history of incarceration tended to develop cognitive  
229 impairment earlier than their never-incarcerated peers (log-rank  $\chi^2(1)=189.1$ ,  $P<0.001$ ) (**Figure**  
230 **2B**). Strikingly, there was a decade difference between the groups in terms of median survival  
231 probability (69 vs. 79). That is, the age at which half of HRS participants were estimated to have  
232 experienced cognitive impairment came a decade earlier for the group with a history of  
233 incarceration compared to those without such history.

234 A Cox proportional hazard model confirmed that lifetime incarceration was associated  
235 with earlier cognitive impairment independent of covariates (HR=1.33, 95% CI [1.17-1.51],  
236  $P<0.001$ ) (**Table S1, Model S1.2**). When *APOE-ε4* genotype and lifetime incarceration were  
237 entered into the same model, their effect sizes did not change indicating independent risk  
238 pathways (**Model S1.3**). Similarly, the addition of multiplicative terms did not indicate the  
239 presence of unexplained excess risk for participants who experienced incarceration and had one  
240 or more *APOE-ε4* alleles (**Model S1.4**).

## 241 **Discussion**

242 Cognitive decline is a hallmark of aging and a prerequisite for neurodegenerative diseases  
243 like Alzheimer's disease. The progression toward cognitive impairment and eventually dementia  
244 can be exacerbated by factors both genetic and environmental. Here, we examined two such risk  
245 factors—one well-known (*APOE-ε4* genotype) and one less well-known (incarceration history)—  
246 and sought to determine the form of their interplay. We observed that *APOE-ε4* genotype and

247 lifetime incarceration were independently related with an increased risk for cognitive impairment  
248 among HRS participants (i.e., a “G+E model” of risk).

249 Surprisingly, when estimating overall risk for cognitive impairment, the effect size for  
250 lifetime incarceration was identical to that for carrying two copies of the *APOE-ε4* allele,  
251 considered to be the strongest genetic risk factor for Alzheimer’s disease.(46) We found that  
252 people with a history of incarceration developed cognitive impairment a full decade earlier than  
253 people who do not have a history of incarceration. These findings position lifetime incarceration  
254 as an environmental risk factor for cognitive impairment that is comparable to *APOE-ε4*  
255 genotype, the leading genetic risk factor for Alzheimer’s disease.

256 The above comparison of risks/hazards between *APOE-ε4* genotype and lifetime  
257 incarceration should be interpreted with caution as *APOE-ε4* genotype is a single, precisely  
258 measured risk factor and past incarceration is likely a proxy (i.e., not causal) for the many  
259 exposures that go along with a criminal lifestyle. Nonetheless, we believe that criminal justice  
260 contact, particularly at the level of incarceration, is an important indicator to consider in  
261 population health research for three reasons. First, past incarceration identifies a segment of the  
262 population that is disproportionately poor, low in academic achievement, and hailing from  
263 minoritized groups(47-51) all risk factors for neurodegenerative diseases. Even if treated merely  
264 as an indicator of the concentration of risk, past incarceration would be valuable information for  
265 research aiming to characterize the health burden in a population. Second, there is evidence that  
266 past incarceration is not merely an indicator of the underlying risk of the (highly selected)  
267 carceral population, but also causally contributes to the health burden of inmates via direct (i.e.,  
268 exposures during their sentence) or indirect means (i.e., incarceration-related exposures  
269 experienced after release), though this line of research is still nascent.(28, 52, 53) Third,



270 incarceration may exacerbate underlying risks (e.g., genetic risk factors) in a multiplicative  
271 fashion, going beyond the mere additive effects. The current study did not find evidence for the  
272 latter possibility (i.e., no statistical interaction between past incarceration and *APOE-ε4* genotype  
273 was observed) but we believe that such a scenario is worth examining in the case of other  
274 outcomes, especially age-related conditions with different genetic profiles (e.g., polygenic  
275 instead of oligogenic).

276         The current study relied on participants in a population health survey. This approach is  
277 imperfect as it assumes that the population of interest (i.e., those affected by the incarceration  
278 experience) are likely to participate in population health surveys after their return to the general  
279 population. To understand the impact of incarceration on cognitive outcomes more fully (and the  
280 progression of age-related conditions more generally) we suggest that researchers move their  
281 attention to variation occurring during the incarceration experience itself. Our results comport  
282 with a litany of studies underscoring the necessity of risk assessment and classification for  
283 offenders during the intake process (i.e., right before they enter prison). Traditional assessments,  
284 such as the Level of Service Inventory-Revised (LSI-R), typically focus on indicators of  
285 criminogenic risk including antisocial cognitions and personality patterns and have been  
286 empirically validated over time and space for both males and females.(54-56) More recently,  
287 scholars have emphasized the importance of embedding indicators of psychiatric and medical  
288 afflictions into these tools as a means of improving service provision.(57, 58) There have also  
289 been calls to provide in-depth assessments and evaluations of the aging process within prisons  
290 (59) to many issues posed by members of the “graying” prison population and the “accelerated  
291 aging” that happens behind bars.

292           According to the United States Census Bureau, the threshold for elderly status among  
293 community samples is approximately 65 years old; by contrast, it is, on average, much lower  
294 among correctional populations and, according to the National Institute of Corrections, generally  
295 includes anyone over the age of 50.(60, 61) Scholarship indicates that incarcerated offenders  
296 over the age of 50 maintain health profiles equivalent to persons outside of prison who are 65  
297 and older.(62) Given the results of the current study, administrators might consider specialized or  
298 alternative placements for individuals with higher levels of genetic risk on the *APOE-ε4*  
299 genotype as a means of anticipating some of the financial and logistical encumbrances (e.g.,  
300 healthcare spending and facility layout/design) that accompany the management of elderly  
301 offenders.(63) In addition to identifying individuals based on genetic risk, prison officials may  
302 also consider administering a battery of validated cognitive tests, such as the Montreal Cognitive  
303 Assessment, to offenders during the intake process to determine baseline levels of functioning  
304 and permit tracking over time to inform future decisions (such as compassionate release). This is  
305 particularly important because manifestations of genetic risk do not remain static over time;  
306 rather, they can be curbed or exacerbated, depending on the prison experience and are crucial to  
307 the establishment of causal ordering/temporality when examining the incarceration-cognitive  
308 impairment nexus. Consider, for example, individuals suffering from traumatic brain injury  
309 (TBI). TBIs vary in their severity and include “mild,” “moderate,” and “severe” classifications;  
310 yet an individual who enters prison with a mild TBI could end up in the severe category if (s)he  
311 is exposed to any number of prison stressors, including violence. Of course, such considerations  
312 must be balanced against other indicators of risk, including the history of and propensity for  
313 violence(64), as well as the ability to maintain and provide safety and security to others.

314 Disentangling the incarceration-neurodegeneration nexus will become of critical  
315 importance in the coming decades, as both the number of individuals living with ADRDs in the  
316 community and the “graying” of the prison population are projected to increase substantially. For  
317 example, recent estimates indicate that approximately 6 million individuals in the U.S. are  
318 currently living with ADRDs; by 2060, this figure will have more than doubled and directly  
319 impact nearly 14 million people. By the same token, as of 2020, approximately 20% of the U.S.  
320 prison population met the age threshold to be considered “elderly” ( $\geq 50$  years old); by 2030, this  
321 figure will rise to approximately 33%.(21, 48) The results of the current study and  
322 aforementioned projections comport with suggestions made recently by Testa *et al*(24) who  
323 emphasized the necessity of studying the nexus between incarceration and ADRDs throughout  
324 the life course because of its potential impact on (1) the reentry and reintegration of affected  
325 individuals, noting that it may increase social and economic disparities which independently  
326 correlate with general wellbeing; (2) the efficacy of treatment from caregivers and community  
327 service providers after an individual’s release; and (3) our understanding of the causal ordering  
328 associated with incarceration, ADRDs, and life expectancy (i.e., causation vs. selection and  
329 reverse causality).(65, 66) In their call for research, they emphasize the importance of analyzing  
330 high-quality data sources. In the current study, we heeded Testa and colleagues’ (2023) call by  
331 examining data from the Health and Retirement Study (HRS), with an explicit focus on the  
332 enduring effects of imprisonment (i.e., beyond the post-incarceration mortality spike).

333 The results and limitations of the current study offer several avenues for future research,  
334 including issues identified by Testa *et al*.(24) First, the HRS did not collect information  
335 regarding the timing of incarceration, which prevented us from establishing temporal order. The  
336 lack of temporal order precludes our ability to examine many relevant aspects of the association

337 between incarceration and cognitive decline. For instance, it is impossible to establish whether a  
338 third variable, like drug use, acts as a mediator or a confounder. To this end, the data do not  
339 permit use to test for reverse causality, and specifically the extent to which cognitive reserves  
340 and impairment affect the probability of incarceration. As Testa *et al.* note, metrics of  
341 impulsivity, intelligence, and brain injury independently correlate with incarceration as well as  
342 cognitive decline. Future research should therefore consider these and other relevant factors  
343 when studying the incarceration-cognitive impairment nexus to parse out causal pathways.  
344 Second, the measurement of lifetime incarceration in the HRS combines many different forms of  
345 incarceration into a single indicator, likely concealing a large degree of heterogeneity in the  
346 carceral experience. The incarceration experience (i.e., the “dose”)(24) varies across many  
347 dimensions including but not limited to the period, age of onset, duration, chronicity, security  
348 level, and subjective experience. It should therefore be a public health priority to understand  
349 which dimensions impart the greatest risk for cognitive decline, thus allowing more targeted  
350 policy conversations. Finally, participants of population health studies such as the HRS are not  
351 always representative specific sub-populations of interest to researchers (e.g., the formerly  
352 incarcerated population). It is possible that the current results were affected by this form of  
353 ascertainment bias, especially if those with incarceration experience and *APOE-ε4* risk alleles  
354 were disproportionately less likely to participate in the study. We do not believe this specific  
355 limitation to have greatly impacted our results, however, given that no difference in rates of  
356 *APOE-ε4* genotype between incarcerated/non-incarcerated groups were present in our analytic  
357 sample (**Table 1**).

## 358 **Conclusion**

359           Incarceration is a heterogenous exposure with many downstream consequences for later  
360 life, some of which put former inmates at increased risk for cognitive decline. We found that  
361 incarceration imparted risk for cognitive impairment in later life that was independent of and  
362 comparable to the leading genetic risk factors. As a risk factor, past incarceration is potent but  
363 also opaque. More exploration of the mechanistic processes underlying the incarceration-  
364 cognitive impairment nexus may contribute to the amelioration of population-wide disparities in  
365 age-related conditions.

## References

- 366  
367
- 368 1. Blitz CL, Wolff N, Shi J. Physical victimization in prison: The role of mental illness.  
369 *International journal of law and psychiatry*. 2008;31(5):385-93.
- 370 2. Felson RB, Silver E, Remster B. Mental disorder and offending in prison. *Criminal*  
371 *Justice and Behavior*. 2012;39(2):125-43.
- 372 3. Listwan SJ, Daigle LE, Hartman JL, Guastaferrero WP. Poly-victimization risk in prison:  
373 The influence of individual and institutional factors. *Journal of interpersonal violence*.  
374 2014;29(13):2458-81.
- 375 4. Pare P-P, Logan MW. Risks of minor and serious violent victimization in prison: The  
376 impact of inmates' mental disorders, physical disabilities, and physical size. *Society and Mental*  
377 *Health*. 2011;1(2):106-23.
- 378 5. Steiner B, Ellison JM, Butler HD, Cain CM. The impact of inmate and prison  
379 characteristics on prisoner victimization. *Trauma, Violence, & Abuse*. 2017;18(1):17-36.
- 380 6. Wooldredge J, Steiner B. Violent victimization among state prison inmates. *Violence and*  
381 *victims*. 2013;28(3):531-51.
- 382 7. Wooldredge JD. Inmate lifestyles and opportunities for victimization. *Journal of research*  
383 *in crime and delinquency*. 1998;35(4):480-502.
- 384 8. Fazel S, Hayes AJ, Bartellas K, Clerici M, Trestman R. Mental health of prisoners:  
385 prevalence, adverse outcomes, and interventions. *The Lancet Psychiatry*. 2016;3(9):871-81.
- 386 9. Binswanger IA, Stern MF, Deyo RA, Heagerty PJ, Cheadle A, Elmore JG, et al. Release  
387 from prison—a high risk of death for former inmates. *New England Journal of Medicine*.  
388 2007;356(2):157-65.
- 389 10. Binswanger IA, Stern MF, Yamashita TE, Mueller SR, Baggett TP, Blatchford PJ.  
390 Clinical risk factors for death after release from prison in Washington State: A nested case-  
391 control study. *Addiction*. 2016;111(3):499-510.
- 392 11. Martin RA, Alexander-Scott N, Berk J, Carpenter RW, Kang A, Hoadley A, et al. Post-  
393 incarceration outcomes of a comprehensive statewide correctional MOUD program: A  
394 retrospective cohort study. *The Lancet Regional Health-Americas*. 2023;18:100419.
- 395 12. Merrall EL, Kariminia A, Binswanger IA, Hobbs MS, Farrell M, Marsden J, et al.  
396 Meta-analysis of drug-related deaths soon after release from prison. *Addiction*.  
397 2010;105(9):1545-54.
- 398 13. Haglund A, Tidemalm D, Jokinen J, Långström N, Lichtenstein P, Fazel S, et al. Suicide  
399 after release from prison: a population-based cohort study from Sweden. *The Journal of clinical*  
400 *psychiatry*. 2014;75(10):20451.

- 401 14. Kariminia A, Law MG, Butler TG, Corben SP, Levy MH, Kaldor JM, et al. Factors  
402 associated with mortality in a cohort of Australian prisoners. *European journal of epidemiology*.  
403 2007;22:417-28.
- 404 15. Kariminia A, Law MG, Butler TG, Levy MH, Corben SP, Kaldor JM, et al. Suicide risk  
405 among recently released prisoners in New South Wales, Australia. *Medical journal of Australia*.  
406 2007;187(7):387-90.
- 407 16. Pratt D, Appleby L, Piper M, Webb R, Shaw J. Suicide in recently released prisoners: a  
408 case-control study. *Psychological medicine*. 2010;40(5):827-35.
- 409 17. Spittal MJ, Forsyth S, Pirkis J, Alati R, Kinner SA. Suicide in adults released from prison  
410 in Queensland, Australia: a cohort study. *J Epidemiol Community Health*. 2014;68(10):993-8.
- 411 18. Massoglia M, Pridemore WA. Incarceration and health. *Annual review of sociology*.  
412 2015;41:291-310.
- 413 19. Ahalt C, Stijacic-Cenzer I, Miller BL, Rosen HJ, Barnes DE, Williams BA. Cognition  
414 and incarceration: Cognitive impairment and its associated outcomes in older adults in jail.  
415 *Journal of the American Geriatrics Society*. 2018;66(11):2065-71.
- 416 20. Cox RJ, Wallace RB. The role of incarceration as a risk factor for cognitive impairment.  
417 *The Journals of Gerontology: Series B*. 2022;77(12):e247-e62.
- 418 21. Kuffel RL, Byers AL, Williams B, Fortinsky R, Li Y, Ruderman MA, et al. Prevalence of  
419 dementia and mild cognitive impairment before incarceration. *Journal of the American Geriatrics*  
420 *Society*. 2022;70(6):1792-9.
- 421 22. Spaulding AC, Seals RM, McCallum VA, Perez SD, Brzozowski AK, Steenland NK.  
422 Prisoner survival inside and outside of the institution: implications for health-care planning.  
423 *American journal of epidemiology*. 2011;173(5):479-87.
- 424 23. Garcia-Grossman IR, Cenzer I, Steinman MA, Williams BA. History of Incarceration and  
425 Its Association With Geriatric and Chronic Health Outcomes in Older Adulthood. *JAMA*  
426 *Network Open*. 2023;6(1):e2249785-e.
- 427 24. Testa A, Jackson DB, Kaufmann CN, Spira AP, Thorpe Jr RJ. Mass incarceration and  
428 cognitive impairment in older adults: Setting a research agenda. *Journal of the American*  
429 *Geriatrics Society*. 2023.
- 430 25. Brooke J, Jackson D. An exploration of the support provided by prison staff, education,  
431 health and social care professionals, and prisoners for prisoners with dementia. *The Journal of*  
432 *Forensic Psychiatry & Psychology*. 2019;30(5):807-23.
- 433 26. Cipriani G, Danti S, Carlesi C, Di Fiorino M. Old and dangerous: Prison and dementia.  
434 *Journal of forensic and legal medicine*. 2017;51:40-4.

- 435 27. Maschi T, Sutfin SL, O'Connell B. Aging, mental health, and the criminal justice system:  
436 A content analysis of the literature. *Journal of Forensic Social Work*. 2012;2(2-3):162-85.
- 437 28. Massoglia M, Remster B. Linkages between incarceration and health. *Public Health*  
438 *Reports*. 2019;134(1\_suppl):8S-14S.
- 439 29. Mahley RW. Apolipoprotein E: cholesterol transport protein with expanding role in cell  
440 biology. *Science*. 1988;240(4852):622-30.
- 441 30. Huang Y, Mahley RW. Apolipoprotein E: structure and function in lipid metabolism,  
442 neurobiology, and Alzheimer's diseases. *Neurobiology of disease*. 2014;72:3-12.
- 443 31. Liu C-C, Kanekiyo T, Xu H, Bu G. Apolipoprotein E and Alzheimer disease: risk,  
444 mechanisms and therapy. *Nature Reviews Neurology*. 2013;9(2):106-18.
- 445 32. Kunkle BW, Grenier-Boley B, Sims R, Bis JC, Damotte V, Naj AC, et al. Genetic meta-  
446 analysis of diagnosed Alzheimer's disease identifies new risk loci and implicates A $\beta$ , tau,  
447 immunity and lipid processing. *Nature genetics*. 2019;51(3):414-30.
- 448 33. Livingston G, Huntley J, Sommerlad A, Ames D, Ballard C, Banerjee S, et al. Dementia  
449 prevention, intervention, and care: 2020 report of the Lancet Commission. *The Lancet*.  
450 2020;396(10248):413-46.
- 451 34. Mehta KM, Yeo GW. Systematic review of dementia prevalence and incidence in United  
452 States race/ethnic populations. *Alzheimer's & Dementia*. 2017;13(1):72-83.
- 453 35. Miller MC, Salgado G, Nasrallah N, Bronson J, Sabatino CP, Mintzer J. Dementia in the  
454 incarcerated population: a retrospective study using the South Carolina Alzheimer's disease  
455 registry, USA. *International Journal of Prisoner Health*. 2023;19(1):109-24.
- 456 36. Sonnega A, Faul JD, Ofstedal MB, Langa KM, Phillips JW, Weir DR. Cohort profile: the  
457 health and retirement study (HRS). *International journal of epidemiology*. 2014;43(2):576-85.
- 458 37. Langa KM, Weir DR, Kabeto M, Sonnega A. Langa-Weir classification of cognitive  
459 function (1995-2020) (user contributed dataset). Ann Arbor, MI: Survey Research Center,  
460 Institute of Social Research, University of Michigan; 2023.
- 461 38. Bonczar TP. Prevalence of Imprisonment in the US Population, 1974-2001: Good Press;  
462 2019.
- 463 39. Faul J, Collins S, Smith J, Zhao W, Kardia S, Weir D. APOE and Serotonin Transporter  
464 Alleles—Early release. Ann Arbor, MI: Survey Research Center, Institute for Social Research,  
465 University of Michigan; 2021.
- 466 40. Ware EB, Faul JD, Mitchell CM, Bakulski KM. Considering the APOE locus in  
467 Alzheimer's disease polygenic scores in the Health and Retirement Study: a longitudinal panel  
468 study. *BMC medical genomics*. 2020;13(1):1-13.



- 469 41. Belsky DW, Domingue BW, Wedow R, Arseneault L, Boardman JD, Caspi A, et al.  
470 Genetic analysis of social-class mobility in five longitudinal studies. *Proceedings of the National*  
471 *Academy of Sciences*. 2018;115(31):E7275-E84.
- 472 42. Vyas MV, Fang J, Kapral MK, Austin PC. Choice of time-scale in time-to-event analysis:  
473 evaluating age-dependent associations. *Annals of Epidemiology*. 2021;62:69-76.
- 474 43. Thiébaud AC, Bénichou J. Choice of time-scale in Cox's model analysis of epidemiologic  
475 cohort data: a simulation study. *Statistics in medicine*. 2004;23(24):3803-20.
- 476 44. Kom EL, Graubard BI, Midthune D. Time-to-event analysis of longitudinal follow-up of  
477 a survey: choice of the time-scale. *American journal of epidemiology*. 1997;145(1):72-80.
- 478 45. VanderWeele TJ, Knol MJ. A tutorial on interaction. *Epidemiologic methods*.  
479 2014;3(1):33-72.
- 480 46. Ward A, Crean S, Mercaldi CJ, Collins JM, Boyd D, Cook MN, et al. Prevalence of  
481 apolipoprotein E4 genotype and homozygotes (APOE e4/e4) among patients diagnosed with  
482 Alzheimer's disease: a systematic review and meta-analysis. *Neuroepidemiology*. 2012;38(1):1-  
483 17.
- 484 47. Minton TD, Zeng Z. Jail inmates in 2020—statistical tables. *NCJ*. 2021;303308.
- 485 48. Carson EA. Prisoners in 2020—Statistical tables. *NCJ*. 2021;302776:1-50.
- 486 49. Pettit B, Western B. Mass imprisonment and the life course: Race and class inequality in  
487 US incarceration. *American sociological review*. 2004;69(2):151-69.
- 488 50. Western B, Pettit B. Incarceration & social inequality. *Daedalus*. 2010;139(3):8-19.
- 489 51. Western B. Poverty, criminal justice, and social justice. *IRP Focus*. 2019;35(3):3-13.
- 490 52. Bačák V, Andersen LH, Schnittker J. The effect of timing of incarceration on mental  
491 health: Evidence from a natural experiment. *Social Forces*. 2019;98(1):303-28.
- 492 53. Nosrati E, Kang-Brown J, Ash M, McKee M, Marmot M, King LP. Incarceration and  
493 mortality in the United States. *SSM-Population Health*. 2021;15:100827.
- 494 54. Dahle K-P. Strengths and limitations of actuarial prediction of criminal reoffense in a  
495 German prison sample: A comparative study of LSI-R, HCR-20 and PCL-R. *International*  
496 *journal of law and psychiatry*. 2006;29(5):431-42.
- 497 55. Manchak SM, Skeem JL, Douglas KS. Utility of the Revised Level of Service Inventory  
498 (LSI-R) in predicting recidivism after long-term incarceration. *Law and human behavior*.  
499 2008;32:477-88.
- 500 56. Smith P, Cullen FT, Latessa EJ. Can 14,737 women be wrong? A meta-analysis of the  
501 LSI-R and recidivism for female offenders. *Criminology & Public Policy*. 2009;8(1):183-208.

- 502 57. Allely C. Prevalence and assessment of traumatic brain injury in prison inmates: A  
503 systematic PRISMA review. *Brain injury*. 2016;30(10):1161-80.
- 504 58. Dulisse BC, Logan MW, Hazlewood AR. Evaluating the use of PTSD Assessment Tools  
505 Within the US Prison Setting: An Exploratory Analysis. *The Prison Journal*.  
506 2023;00328855231173144.
- 507 59. Stoliker BE, Varanese J. Spending the golden years behind bars: Predictors of mental  
508 health issues among geriatric prisoners. *Victims & Offenders*. 2017;12(5):718-40.
- 509 60. Duckett N, Fox TA, Harsha TC, Vish J. Issues in Maryland sentencing: The aging  
510 Maryland prison population. College Park: Maryland State Commission on Criminal Sentencing  
511 Policy Retrieved from National Institute of Corrections website on January. 2001;14:2006.
- 512 61. Falter RG. Elderly inmates: An emerging correctional population. *Correctional Health*  
513 *Journal*. 2006;1(3):52-69.
- 514 62. Aday RH. Aging prisoners: Crisis in American corrections. 2003.
- 515 63. Dulisse BC, Fitch CH, Logan M. No silver lining: Evaluating the need for consistent and  
516 appropriate functionality assessments among the increasing and incarcerated elderly population.  
517 *Criminal Justice Review*. 2020;45(4):484-501.
- 518 64. Logan MW, Long J, DeLisi M, Hazelwood AR. Serious, Violent, and Chronic Prison  
519 Misconduct: Are the Predictors the Same for Women and Men? *The Prison Journal*.  
520 2023;103(1):23-44.
- 521 65. Barenboim I. Crime and inequality: reverse causality. Harvard University, 2007. Working  
522 paper; 2007.
- 523 66. Butsang T, McLuhan A, Keown LA, Fung K, Matheson FI. Sex differences in pre-  
524 incarceration mental illness, substance use, injury and sexually transmitted infections and health  
525 service utilization: a longitudinal linkage study of people serving federal sentences in Ontario.  
526 *Health & Justice*. 2023;11(1):1-11.
- 527 67. Tierney N, Cook D. Expanding tidy data principles to facilitate missing data exploration,  
528 visualization and assessment of imputations. *Journal of Statistical Software*. 2023;105:1-31.  
529

## Supplemental material

**Table S1.** Cox proportional hazard model of lifetime incarceration and *APOE-ε4* genotype on first cognitive impairment.

| Variable <sup>1</sup>  | Model S1.1        |                     | Model S1.2        |                     | Model S1.3        |                     | Model S1.4        |                     |
|------------------------|-------------------|---------------------|-------------------|---------------------|-------------------|---------------------|-------------------|---------------------|
|                        | HR <sup>2,3</sup> | 95% CI <sup>3</sup> | HR <sup>2,3</sup> | 95% CI <sup>3</sup> | HR <sup>2,3</sup> | 95% CI <sup>3</sup> | HR <sup>2,3</sup> | 95% CI <sup>3</sup> |
| <i>APOE-ε4</i>         |                   |                     |                   |                     |                   |                     |                   |                     |
| allele count           |                   |                     |                   |                     |                   |                     |                   |                     |
| One copy               | 1.19***           | [1.08, 1.31]        |                   |                     | 1.19***           | [1.08, 1.31]        | 1.20***           | [1.08, 1.33]        |
| Two copies             | 1.56***           | [1.20, 2.02]        |                   |                     | 1.57***           | [1.21, 2.04]        | 1.58**            | [1.20, 2.08]        |
| Lifetime incarceration |                   |                     | 1.33***           | [1.17, 1.51]        | 1.33***           | [1.17, 1.51]        | 1.36***           | [1.17, 1.57]        |
| Lifetime Incarceration |                   |                     |                   |                     |                   |                     |                   |                     |
| × One copy             |                   |                     |                   |                     |                   |                     | 0.94              | [0.72, 1.22]        |
| × Two copies           |                   |                     |                   |                     |                   |                     | 0.97              | [0.41, 2.29]        |

<sup>1</sup> All models adjusted for sex, race/ethnicity, high school completion, smoking history, stroke history, and social origins index. All models were stratified by HRS cohort.

<sup>2</sup> \*p<0.05; \*\*p<0.01; \*\*\*p<0.001

<sup>3</sup> HR = Hazard Ratio, CI = Confidence Interval

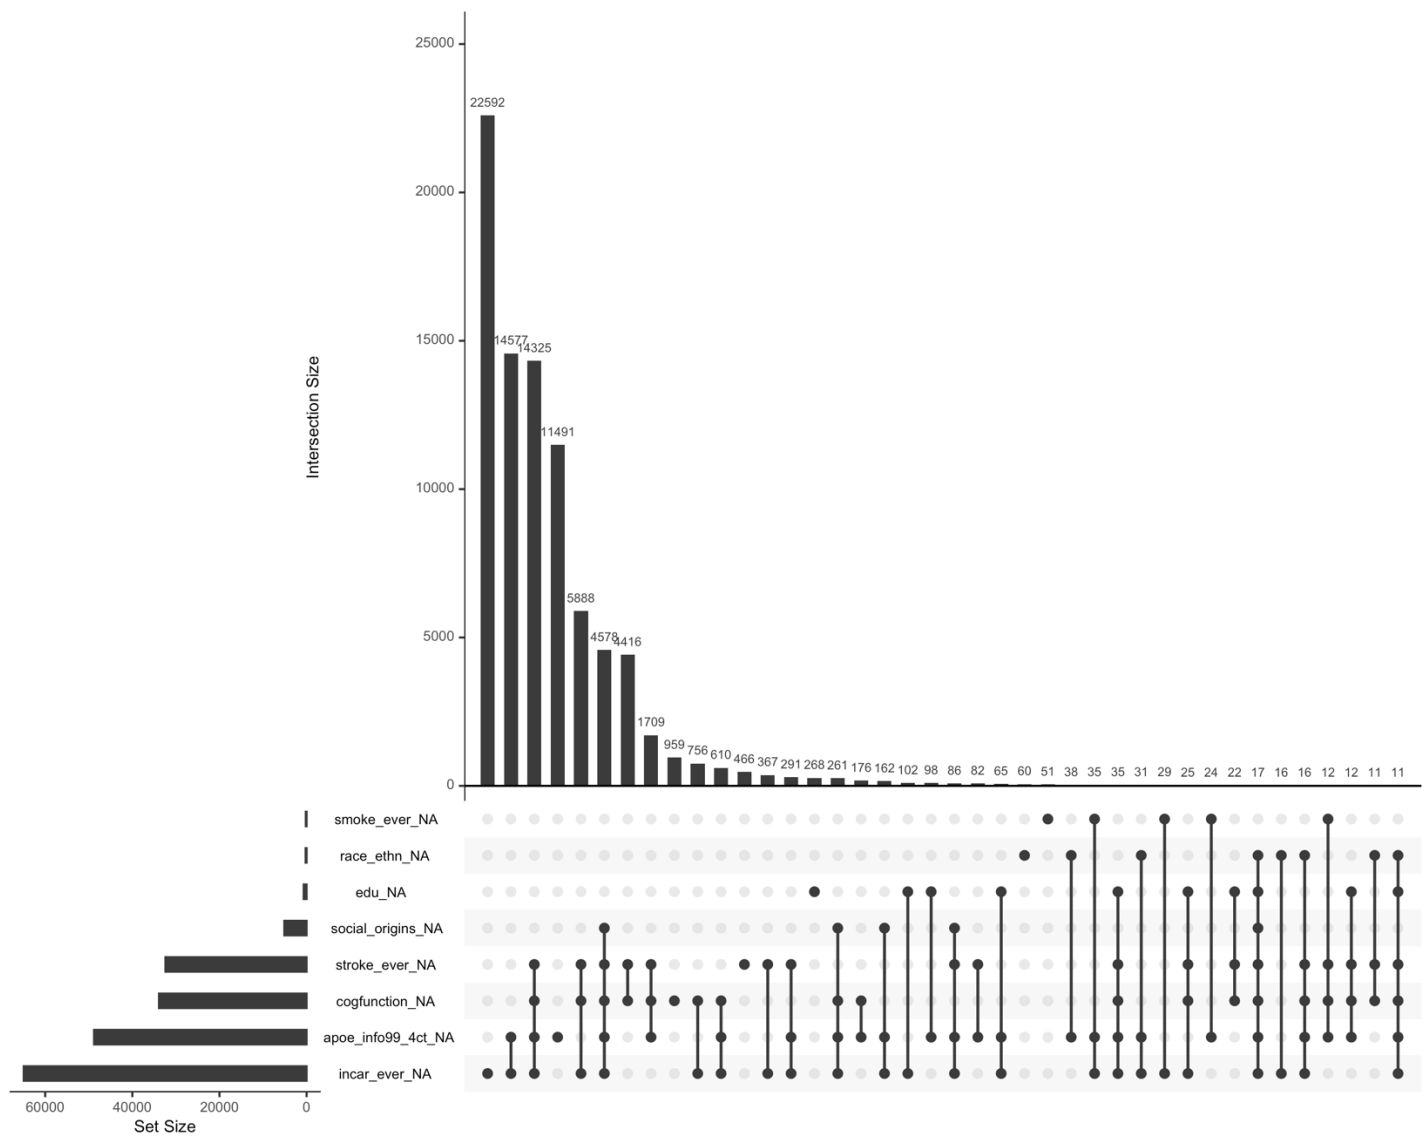

**Figure S1.** Patterns of missingness across study variables. Missing data counts refer to observations, not cases. Prior to listwise deletion, the sample included  $N=23,797$  cases and  $N=141,392$  observations. After restriction to complete cases, the analytic sample contained  $N=6,949$  cases and  $N=55,345$  observations. Note: only variables with missing values are displayed; HRS participants from the HRS and LBB cohorts were not included in the current analysis due to small case counts (5 for HRS) and recruitment after 2012/2014 (LBB) when incarceration variables were administered. Upset plot was created using the R package *maniar*.(67)
